# Supplementary material for: Design of cytocompatible bacteria-repellent bio-based polyester films via an aqueous photoactivated process
Source: Royal Society of Chemistry journal article supplement (doi:10.1039/c5tb02659h), 2016-01-01
Supplement: c5tb02659h1.pdf [file c5tb02659h1.pdf]

## SUPPORTING INFORMATION

### **Design of cytocompatible bacteria-repellent bio-based Polyester films via an aqueous photoactivated process**

Michael Condat, Christophe Helary, Thibaud Coradin, Pierre Dubot, Julien Babinot, Marco Faustini, Samir Abbad Andaloussi, Estelle Renard, Valérie Langlois, Davy-Louis Versace

Figure S1.

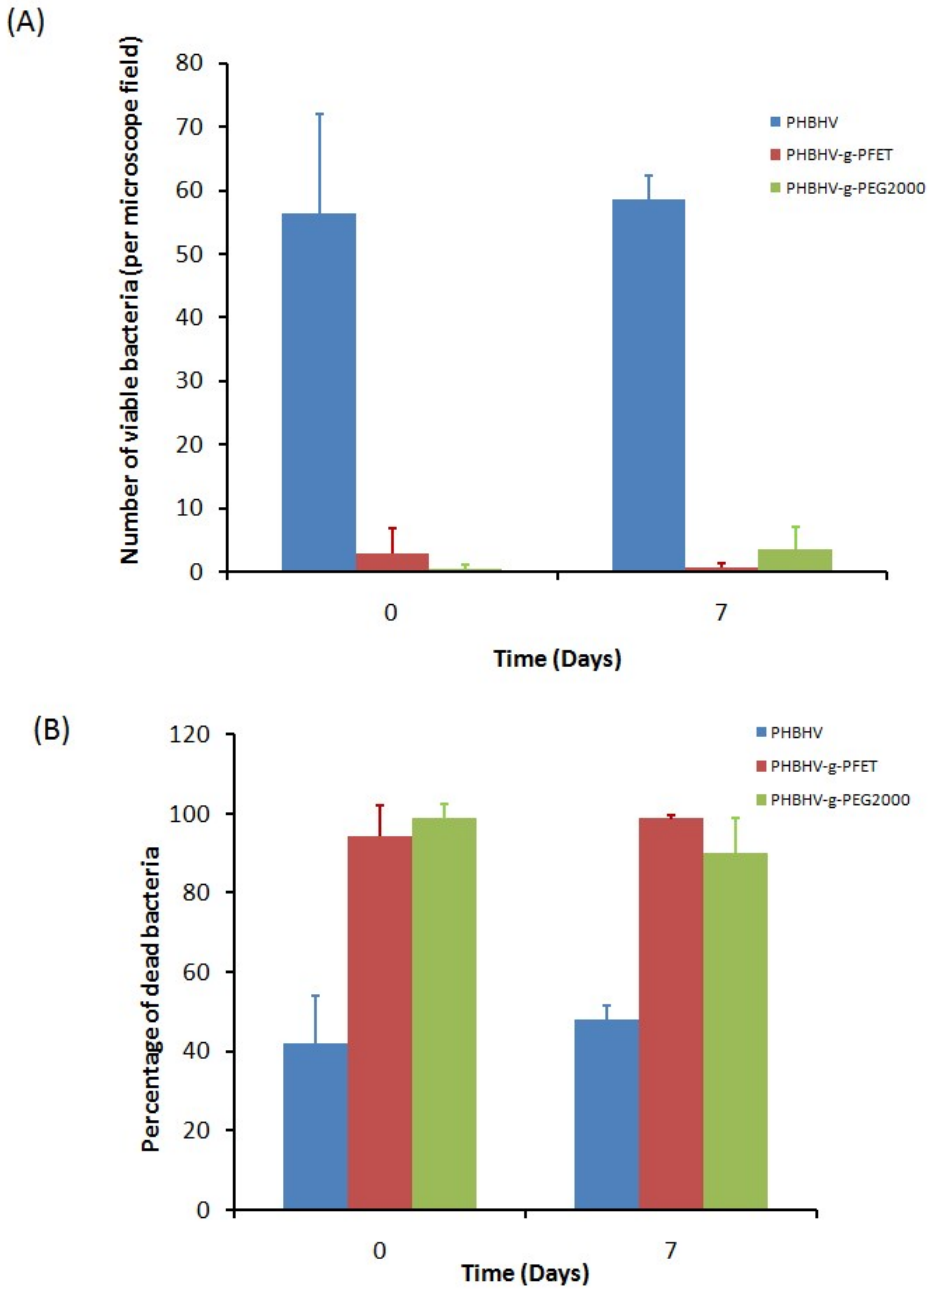

Figure S1. A) Number of viable bacteria (per microscope field) seeded on films incubated or not in culture medium for 7 days, and B) Percentage of dead bacteria on the native and the two different modified PHBV films (PHBV-g-PFET and PHBV-g-PEG<sub>2000</sub> films)

Figure S2.

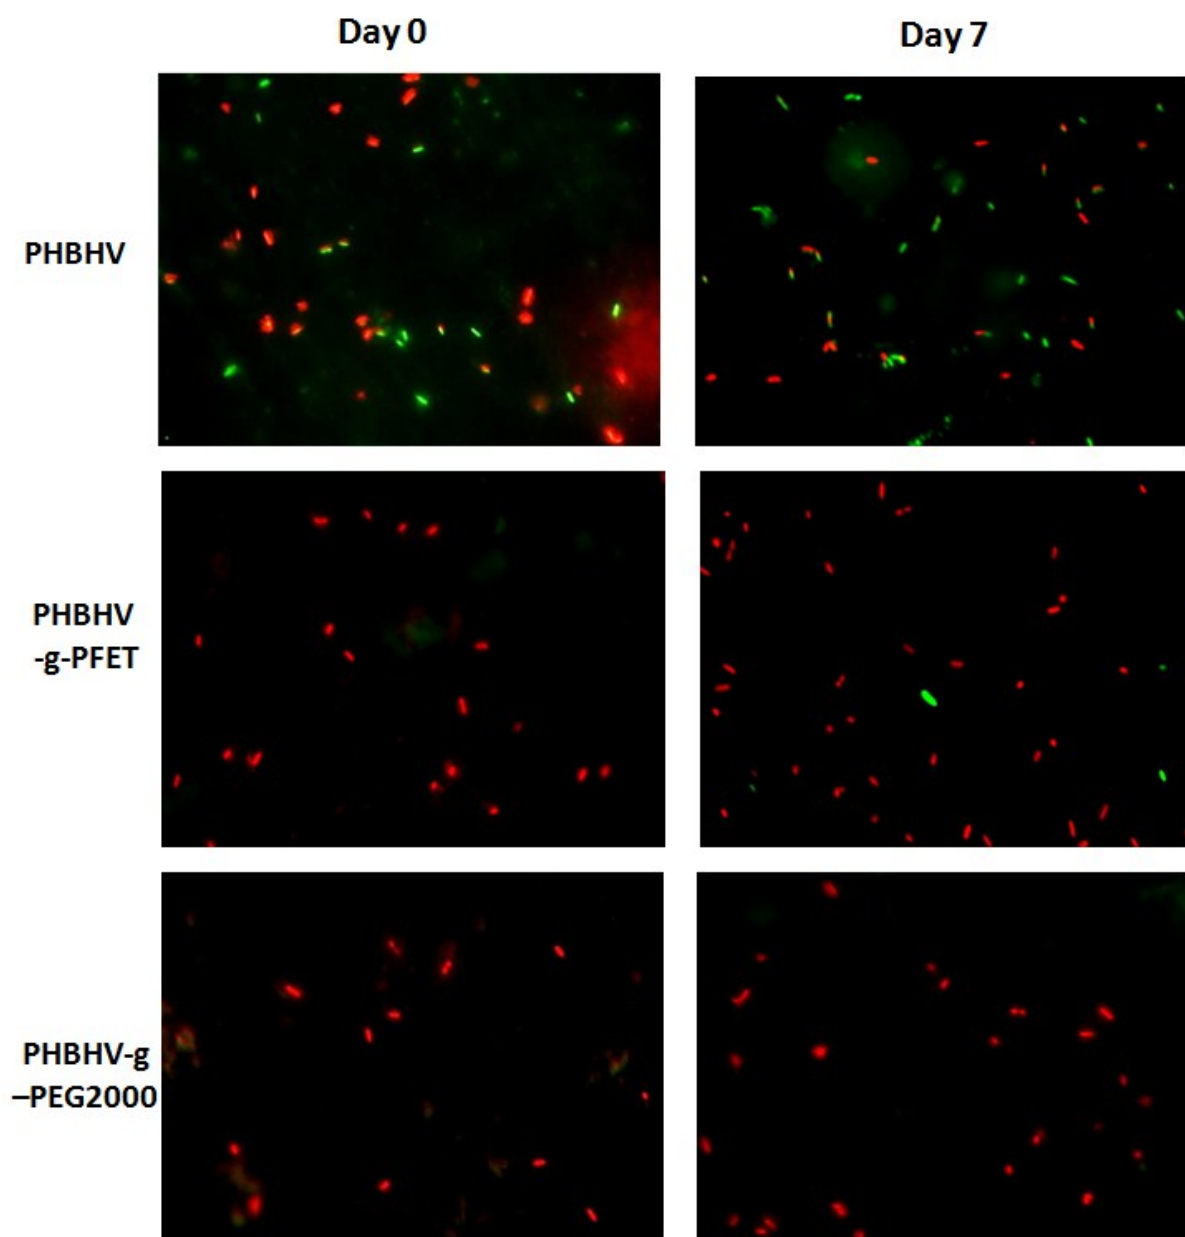

**Figure S2.** Live/dead assay: Fluorescence microscopy images of *E. coli* cultured on the PHBHV and on the two modified PHBHV films (PHBHV-*g*-PFET and PHBHV-*g*-PEG<sub>2000</sub> films). Films were incubated for 7 days in culture medium prior bacteria seeding (Day 7) or not (Day 0).
